# Supplementary material for: Pre-Therapeutic VEGF Level in Plasma Is a Prognostic Bio-Marker in Head and Neck Squamous Cell Carcinoma (HNSCC)
Source: MDPI journal article supplement (doi:10.3390/cancers13153781), 2021-07-27
Supplement: s1 [file s1]

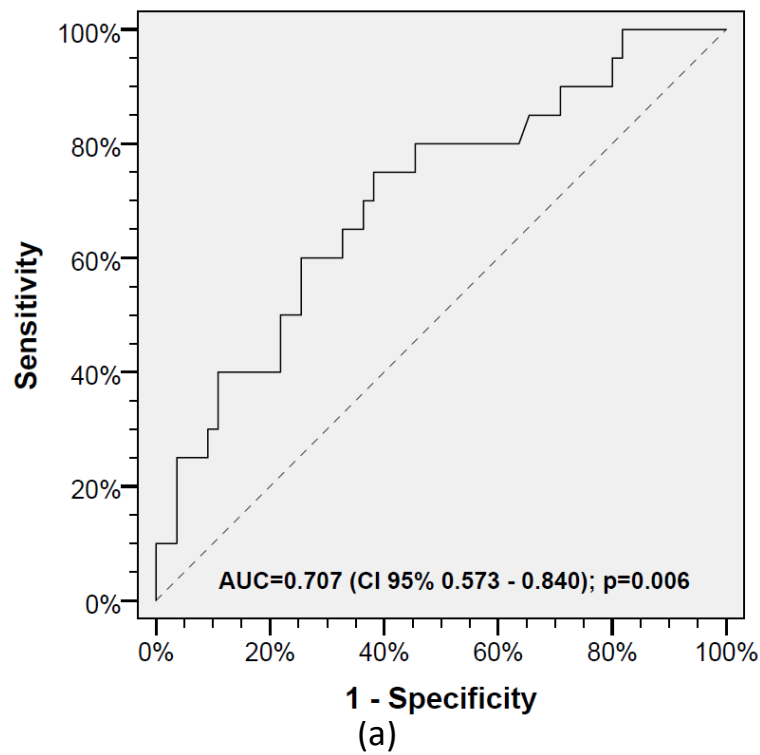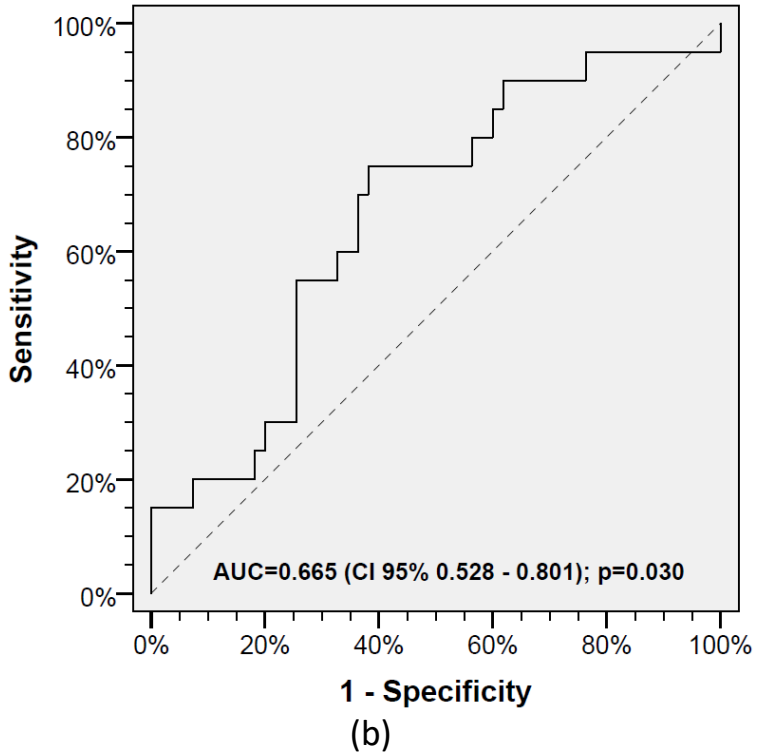

| VEGF plasma<br>(ng/L) | Sensitivity | FDR   | Specificity | Youden<br>index | Below (0)<br>or above<br>(1) cut-off |
|-----------------------|-------------|-------|-------------|-----------------|--------------------------------------|
| 0                     | 1.000       | 1.000 | 0.000       | 0.000           | 0                                    |
| 0.7050                | 1.000       | 0.964 | 0.036       | 0.036           | 0                                    |
| 2.2800                | 1.000       | 0.927 | 0.073       | 0.073           | 0                                    |
| 3.3650                | 1.000       | 0.909 | 0.091       | 0.091           | 0                                    |
| 3.6600                | 1.000       | 0.891 | 0.109       | 0.109           | 0                                    |
| 4.2100                | 1.000       | 0.855 | 0.145       | 0.145           | 0                                    |
| 4.6200                | 1.000       | 0.836 | 0.164       | 0.164           | 0                                    |
| 4.8950                | 1.000       | 0.818 | 0.182       | 0.182           | 0                                    |
| 5.5600                | 0.950       | 0.818 | 0.182       | 0.173           | 0                                    |
| 6.2250                | 0.950       | 0.800 | 0.200       | 0.190           | 0                                    |
| 6.8300                | 0.900       | 0.800 | 0.200       | 0.180           | 0                                    |
| 7.3950                | 0.900       | 0.782 | 0.218       | 0.196           | 0                                    |
| 7.7600                | 0.900       | 0.764 | 0.236       | 0.213           | 0                                    |
| 8.0700                | 0.900       | 0.745 | 0.255       | 0.229           | 0                                    |
| 8.2400                | 0.900       | 0.727 | 0.273       | 0.245           | 0                                    |
| 8.4050                | 0.900       | 0.709 | 0.291       | 0.262           | 0                                    |
| 8.9900                | 0.850       | 0.709 | 0.291       | 0.247           | 0                                    |
| 10.0700               | 0.850       | 0.691 | 0.309       | 0.263           | 0                                    |
| 10.7450               | 0.850       | 0.673 | 0.327       | 0.278           | 0                                    |
| 10.8900               | 0.850       | 0.655 | 0.345       | 0.294           | 0                                    |
| 11.2450               | 0.800       | 0.636 | 0.364       | 0.291           | 0                                    |
| 11.8650               | 0.800       | 0.618 | 0.382       | 0.305           | 0                                    |
| 12.9750               | 0.800       | 0.600 | 0.400       | 0.320           | 0                                    |
| 13.7900               | 0.800       | 0.582 | 0.418       | 0.335           | 0                                    |
| 14.3750               | 0.800       | 0.564 | 0.436       | 0.349           | 0                                    |
| 15.2800               | 0.800       | 0.545 | 0.455       | 0.364           | 0                                    |
| 15.6500               | 0.800       | 0.527 | 0.473       | 0.378           | 0                                    |
| 16.4700               | 0.800       | 0.509 | 0.491       | 0.393           | 0                                    |
| 17.8800               | 0.800       | 0.491 | 0.509       | 0.407           | 0                                    |
| 18.6100               | 0.800       | 0.473 | 0.527       | 0.422           | 0                                    |
| 19.0550               | 0.800       | 0.455 | 0.545       | 0.436           | 0                                    |
| 19.9300               | 0.750       | 0.455 | 0.545       | 0.409           | 0                                    |
| 20.7550               | 0.750       | 0.436 | 0.564       | 0.423           | 0                                    |
| 22.2750               | 0.750       | 0.418 | 0.582       | 0.436           | 0                                    |
| 23.9650               | 0.750       | 0.400 | 0.600       | 0.450           | 0                                    |
| 25.3700               | 0.750       | 0.382 | 0.618       | 0.464           | 0                                    |
| 26.4150               | 0.700       | 0.382 | 0.618       | 0.433           | 1                                    |
| 26.6800               | 0.700       | 0.364 | 0.636       | 0.445           | 1                                    |
| 28.0550               | 0.650       | 0.364 | 0.636       | 0.414           | 1                                    |
| 30.1900               | 0.650       | 0.345 | 0.655       | 0.425           | 1                                    |
| 31.2550               | 0.650       | 0.327 | 0.673       | 0.437           | 1                                    |
| 31.6250               | 0.600       | 0.327 | 0.673       | 0.404           | 1                                    |
| 32.0200               | 0.600       | 0.309 | 0.691       | 0.415           | 1                                    |
| 33.2800               | 0.600       | 0.291 | 0.709       | 0.425           | 1                                    |
| 36.4750               | 0.600       | 0.273 | 0.727       | 0.436           | 1                                    |
| 39.1550               | 0.600       | 0.255 | 0.745       | 0.447           | 1                                    |
| 39.7700               | 0.550       | 0.255 | 0.745       | 0.410           | 1                                    |
| 39.9300               | 0.500       | 0.255 | 0.745       | 0.373           | 1                                    |
| 40.6500               | 0.500       | 0.236 | 0.764       | 0.382           | 1                                    |
| 41.8300               | 0.500       | 0.218 | 0.782       | 0.391           | 1                                    |
| 42.4500               | 0.450       | 0.218 | 0.782       | 0.352           | 1                                    |
| 43.9650               | 0.400       | 0.218 | 0.782       | 0.313           | 1                                    |
| 45.6950               | 0.400       | 0.200 | 0.800       | 0.320           | 1                                    |
| 48.2200               | 0.400       | 0.182 | 0.818       | 0.327           | 1                                    |
| 51.2000               | 0.400       | 0.164 | 0.836       | 0.335           | 1                                    |
| 52.2950               | 0.400       | 0.145 | 0.855       | 0.342           | 1                                    |
| 53.2800               | 0.400       | 0.127 | 0.873       | 0.349           | 1                                    |
| 56.0700               | 0.400       | 0.109 | 0.891       | 0.356           | 1                                    |
| 58.8100               | 0.350       | 0.109 | 0.891       | 0.312           | 1                                    |
| 60.7100               | 0.300       | 0.109 | 0.891       | 0.267           | 1                                    |
| 62.5100               | 0.300       | 0.091 | 0.909       | 0.273           | 1                                    |
| 64.9800               | 0.250       | 0.091 | 0.909       | 0.227           | 1                                    |
| 68.3000               | 0.250       | 0.073 | 0.927       | 0.232           | 1                                    |
| 70.1550               | 0.250       | 0.055 | 0.945       | 0.236           | 1                                    |
| 75.0850               | 0.250       | 0.036 | 0.964       | 0.241           | 1                                    |
| 83.5250               | 0.200       | 0.036 | 0.964       | 0.193           | 1                                    |
| 89.9850               | 0.150       | 0.036 | 0.964       | 0.145           | 1                                    |
| 113.2250              | 0.100       | 0.036 | 0.964       | 0.096           | 1                                    |
| 136.5650              | 0.100       | 0.018 | 0.982       | 0.098           | 1                                    |
| 144.0100              | 0.100       | 0.000 | 1.000       | 0.100           | 1                                    |
| 177.6450              | 0.050       | 0.000 | 1.000       | 0.050           | 1                                    |
| 206.3200              | 0.000       | 0.000 | 1.000       | 0.000           | 1                                    |

| VEGF serum<br>(ng/L) | Sensitivity | FDR   | Specificity | Youden<br>index | Below (0)<br>or above<br>(1) cut-off |
|----------------------|-------------|-------|-------------|-----------------|--------------------------------------|
| 0                    | 1.000       | 1.000 | 0.000       | 0.000           | 0                                    |
| 9.7800               | 0.950       | 1.000 | 0.000       | 0.000           | 0                                    |
| 23.0950              | 0.950       | 0.982 | 0.018       | 0.017           | 0                                    |
| 31.9700              | 0.950       | 0.964 | 0.036       | 0.035           | 0                                    |
| 43.0950              | 0.950       | 0.945 | 0.055       | 0.052           | 0                                    |
| 51.5400              | 0.950       | 0.927 | 0.073       | 0.069           | 0                                    |
| 54.5250              | 0.950       | 0.909 | 0.091       | 0.086           | 0                                    |
| 56.8150              | 0.950       | 0.891 | 0.109       | 0.104           | 0                                    |
| 59.4500              | 0.950       | 0.873 | 0.127       | 0.121           | 0                                    |
| 61.5350              | 0.950       | 0.855 | 0.145       | 0.138           | 0                                    |
| 63.6200              | 0.950       | 0.836 | 0.164       | 0.155           | 0                                    |
| 68.7050              | 0.950       | 0.818 | 0.182       | 0.173           | 0                                    |
| 72.5900              | 0.950       | 0.800 | 0.200       | 0.190           | 0                                    |
| 74.6900              | 0.950       | 0.782 | 0.218       | 0.207           | 0                                    |
| 80.8600              | 0.950       | 0.764 | 0.236       | 0.225           | 0                                    |
| 86.1700              | 0.900       | 0.764 | 0.236       | 0.213           | 0                                    |
| 93.9750              | 0.900       | 0.745 | 0.255       | 0.229           | 0                                    |
| 101.1100             | 0.900       | 0.727 | 0.273       | 0.245           | 0                                    |
| 106.5750             | 0.900       | 0.709 | 0.291       | 0.262           | 0                                    |
| 113.8200             | 0.900       | 0.691 | 0.309       | 0.278           | 0                                    |
| 116.6850             | 0.900       | 0.673 | 0.327       | 0.295           | 0                                    |
| 117.5700             | 0.900       | 0.655 | 0.345       | 0.311           | 0                                    |
| 119.0450             | 0.900       | 0.636 | 0.364       | 0.327           | 0                                    |
| 120.8250             | 0.900       | 0.618 | 0.382       | 0.344           | 0                                    |
| 123.5800             | 0.850       | 0.618 | 0.382       | 0.325           | 0                                    |
| 127.3400             | 0.850       | 0.600 | 0.400       | 0.340           | 0                                    |
| 132.6800             | 0.800       | 0.600 | 0.400       | 0.320           | 0                                    |
| 137.0600             | 0.800       | 0.582 | 0.418       | 0.335           | 0                                    |
| 140.7150             | 0.800       | 0.564 | 0.436       | 0.349           | 0                                    |
| 144.5850             | 0.750       | 0.564 | 0.436       | 0.327           | 0                                    |
| 146.7000             | 0.750       | 0.545 | 0.455       | 0.341           | 0                                    |
| 148.9850             | 0.750       | 0.527 | 0.473       | 0.355           | 0                                    |
| 150.5250             | 0.750       | 0.509 | 0.491       | 0.368           | 0                                    |
| 158.3050             | 0.750       | 0.491 | 0.509       | 0.382           | 0                                    |
| 166.5000             | 0.750       | 0.473 | 0.527       | 0.395           | 0                                    |
| 167.8050             | 0.750       | 0.455 | 0.545       | 0.409           | 0                                    |
| 171.0450             | 0.750       | 0.436 | 0.564       | 0.423           | 0                                    |
| 176.0900             | 0.750       | 0.418 | 0.582       | 0.436           | 0                                    |
| 179.7500             | 0.750       | 0.400 | 0.600       | 0.450           | 0                                    |
| 182.9600             | 0.750       | 0.382 | 0.618       | 0.464           | 0                                    |
| 187.0150             | 0.700       | 0.382 | 0.618       | 0.433           | 0                                    |
| 193.0300             | 0.700       | 0.364 | 0.636       | 0.445           | 0                                    |
| 199.8100             | 0.650       | 0.364 | 0.636       | 0.414           | 0                                    |
| 208.0700             | 0.600       | 0.364 | 0.636       | 0.382           | 0                                    |
| 221.5650             | 0.600       | 0.345 | 0.655       | 0.393           | 0                                    |
| 233.3850             | 0.600       | 0.327 | 0.673       | 0.404           | 0                                    |
| 236.6700             | 0.550       | 0.327 | 0.673       | 0.370           | 0                                    |
| 239.4400             | 0.550       | 0.309 | 0.691       | 0.380           | 0                                    |
| 246.4950             | 0.550       | 0.291 | 0.709       | 0.390           | 0                                    |
| 251.0900             | 0.550       | 0.273 | 0.727       | 0.400           | 0                                    |
| 263.6550             | 0.550       | 0.255 | 0.745       | 0.410           | 0                                    |
| 264.6000             | 0.500       | 0.255 | 0.745       | 0.373           | 1                                    |
| 265.6450             | 0.450       | 0.255 | 0.745       | 0.335           | 1                                    |
| 266.5000             | 0.400       | 0.255 | 0.745       | 0.298           | 1                                    |
| 267.5550             | 0.350       | 0.255 | 0.745       | 0.261           | 1                                    |
| 275.6050             | 0.300       | 0.255 | 0.745       | 0.224           | 1                                    |
| 284.7700             | 0.300       | 0.236 | 0.764       | 0.229           | 1                                    |
| 292.0100             | 0.300       | 0.218 | 0.782       | 0.235           | 1                                    |
| 298.1000             | 0.300       | 0.200 | 0.800       | 0.240           | 1                                    |
| 306.2550             | 0.250       | 0.200 | 0.800       | 0.200           | 1                                    |
| 322.3750             | 0.250       | 0.182 | 0.818       | 0.205           | 1                                    |
| 332.0100             | 0.200       | 0.182 | 0.818       | 0.164           | 1                                    |
| 334.3550             | 0.200       | 0.164 | 0.836       | 0.167           | 1                                    |
| 344.7850             | 0.200       | 0.145 | 0.855       | 0.171           | 1                                    |
| 354.2600             | 0.200       | 0.127 | 0.873       | 0.175           | 1                                    |
| 358.8300             | 0.200       | 0.109 | 0.891       | 0.178           | 1                                    |
| 365.8950             | 0.200       | 0.091 | 0.909       | 0.182           | 1                                    |
| 397.2250             | 0.200       | 0.073 | 0.927       | 0.185           | 1                                    |
| 442.7150             | 0.150       | 0.073 | 0.927       | 0.139           | 1                                    |
| 466.4500             | 0.150       | 0.055 | 0.945       | 0.142           | 1                                    |
| 473.6150             | 0.150       | 0.036 | 0.964       | 0.145           | 1                                    |
| 481.2500             | 0.150       | 0.018 | 0.982       | 0.147           | 1                                    |
| 494.5850             | 0.150       | 0.000 | 1.000       | 0.150           | 1                                    |
| 593.5100             | 0.100       | 0.000 | 1.000       | 0.100           | 1                                    |
| 756.3450             | 0.050       | 0.000 | 1.000       | 0.050           | 1                                    |
| 826.3500             | 0.000       | 0.000 | 1.000       | 0.000           | 1                                    |

**(c)**

Figure S1. Receiver-operator characteristics (ROC) of vascular endothelial growth factor (VEGF) concentration in plasma [(a), (c)] and serum [(b), (d)] for event-free survival of therapy-naïve head and neck squamous cell carcinoma patients. (a) ROC for VEGF<sub>plasma</sub>; (b) ROC for VEGF<sub>serum</sub>; (c) tabulated sensitivity, false-discovery rate (FDR), specificity, and Youden indices for VEGF<sub>plasma</sub> to define the cut-off for VEGF<sub>plasma</sub> of 26 ng/L according the maximum Youden score (underlined); (d) tabulated sensitivity, false-discovery rate (FDR), specificity, and Youden indices for VEGF<sub>serum</sub> to define the cut-off for VEGF<sub>serum</sub> of 264 ng/L according the maximum Youden score (underlined).

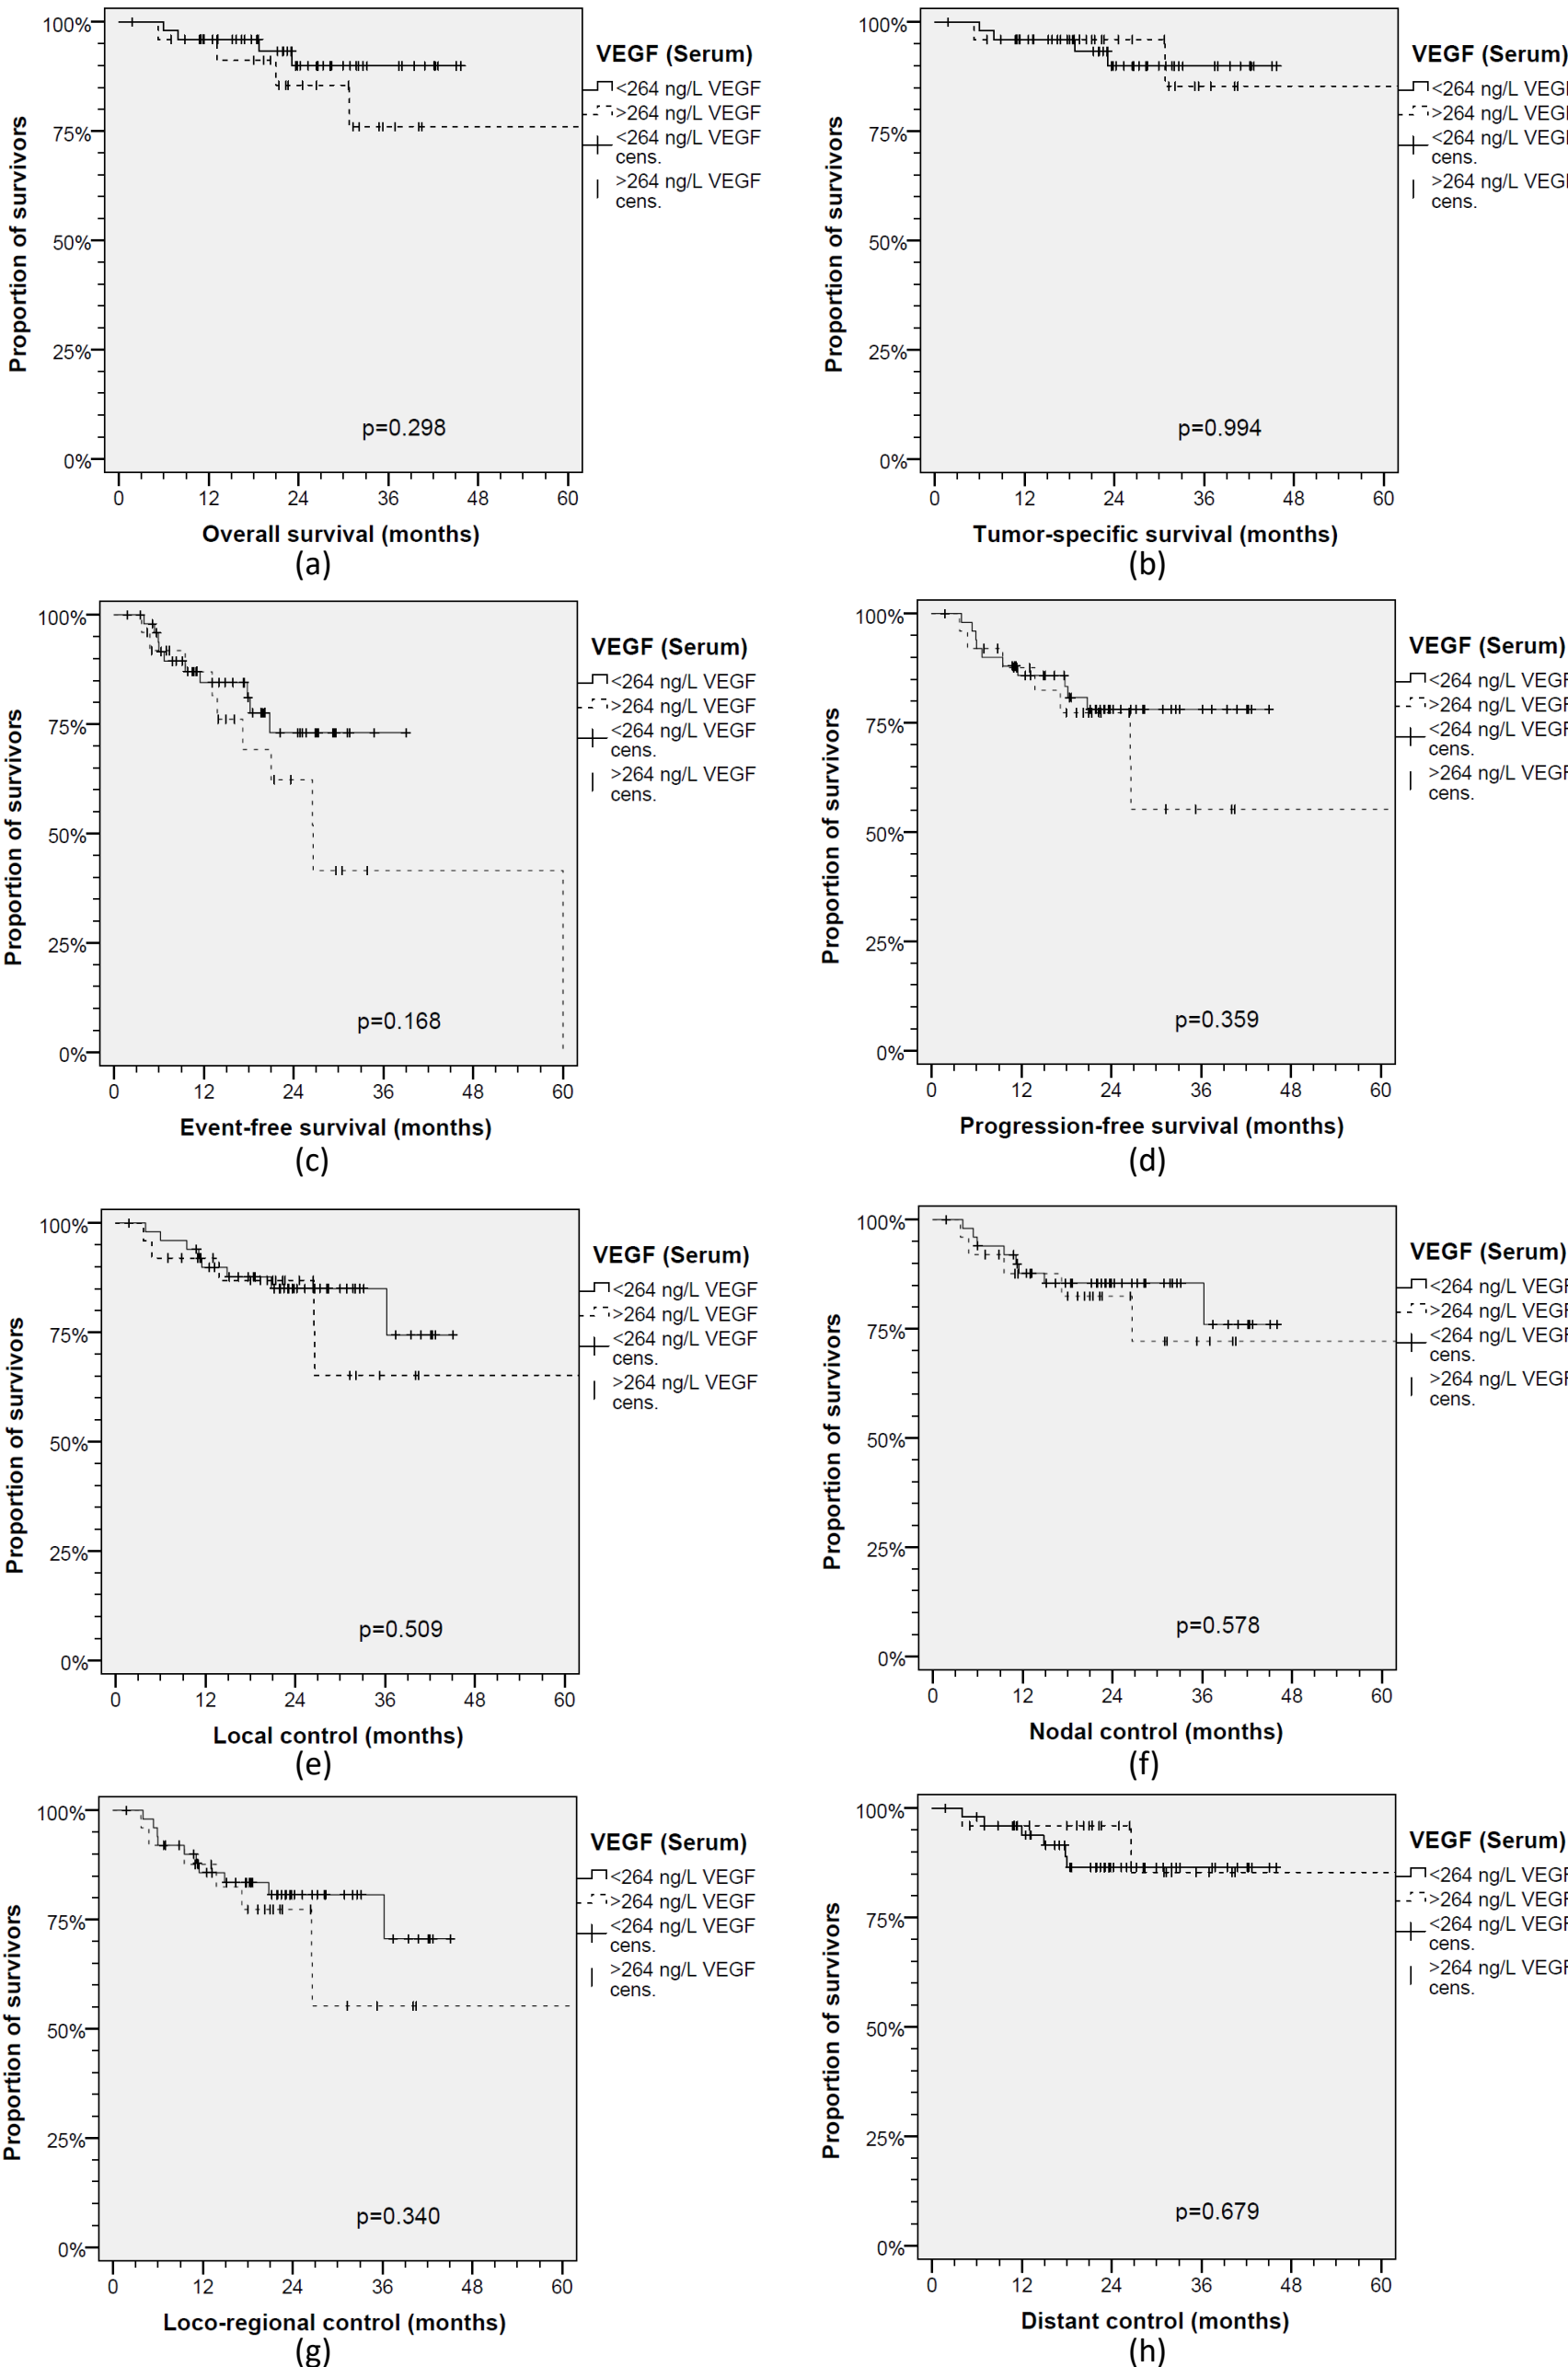

Figure S2. Kaplan-Meier plots for cumulative survival in head and neck squamous cell carcinoma patients from the test cohort stratified according to vascular endothelial growth factor (VEGF) in pre-therapeutic serum. (a) overall survival; (b) tumor-specific survival; (c) event-free survival; (d) progression-free survival; (e) local control; (f) nodal control; (g) loco-regional control; (h) distant control.  $p$  values shown are from 2-sided log-rank test.
